# Supplementary material for: Modelling quarantine effects on SARS-CoV-2 epidemiological dynamics in Chilean communes and their relationship with the Social Priority Index
Source: PeerJ journal article supplement (doi:10.7717/peerj.14892), 2023-03-10
Supplement: Programs.zip [file Programs.zip]

Before using the programs for the first time, it is recommended to read the following:

1. The MATLAB program has two modes (those that run fine if you keep the files in the same folder and use the MATLAB R2013a version):

Mode 1 (uses `fmincon()`):

Run `P1Stage1` (for stage 1 data) or `P1Stage2` (for stage 2 data).

Mode 2 (uses the `fminsearch()`):

Run `P2Stage1` (for stage 1 data) or `P2Stage2` (for stage 2 data).

2. The input data are in the files `data_stage1.xlsx` and `data_stage2.xlsx`, where -1 has been used to indicate the end and beginning of the data series, respectively. The commune numbers, as well as the data, are from the file “data stage 1 and stage 2 province of Santiago.xlsx”, available as a supplementary material.

3. As output you will get a file of type `output_PXStageY.xlsx`. The file will contain the values of the following parameters: Commune number,  $N$ ,  $\alpha$ ,  $U_0$ ,  $Q_0$ ,  $\gamma$ ,  $\beta$ ,  $R$  and  $r_2$ , in that order (Note that the notation here is not exactly the same as in the article or in the programs).

4. Additionally, the programs for stage 1 will generate a file of the type `U0Q0_for_PXStage2.xlsx`, which is required as additional input by the programs corresponding to stage 2.

5. In the execution of the programs, the adjustment for the commune San Ramón (Number 30) is plotted, which can be modified in the codes.
